# Supplementary material for: A lysosome-to-nucleus signalling mechanism senses and regulates the lysosome via mTOR and TFEB
Source: PubMed Central journal article supplement — EMBO J. 2012 Feb 17;31(5):1095–108. doi: 10.1038/emboj.2012.32 (PMC3298007; doi:10.1038/emboj.2012.32), 2012-02-17

## SUPPLEMENTARY FIGURE LEGENDS

### Figure S1

Detection of endogenous TcFEB in primary hepatocytes. Protein extracts from 3 controls and 3 TcFEB<sup>-/-</sup> primary hepatocyte cell lines derived from an albumin-CRE driven conditional TcFEB KO mouse, were probed with TFEB (MyBiosource) and tubulin antibodies. A cross-reacting band corresponding to the TcFEB protein is clearly detected in control samples only. The very faint band detected in TcFEB<sup>-/-</sup> cells is likely the result of incomplete penetrance of CRE-mediated cleavage.

### Figure S2

Amino acids induce TFEB molecular weight shift. Immunoblotting of protein extracts isolated from HEK-293T cells transfected either TFEB-3xFLAG or with an empty vector were nutrient starved for 50 min, or starved and then stimulated for 10 mins with amino acids (A.A.). Antibody used were p-T389-S6K, S6K and FLAG.

### Figure S3

Detection of p-S142-TFEB using a p-S142-TFEB antibody. Immunoblotting of protein extracts isolated from HeLa cells transfected with an empty vector, with TFEB-3XFLAG or with TFEB-<sup>S142A</sup>-3XFLAG were probed with p-S142-TFEB or Flag antibodies.

#### **Figure S4**

Analysis of the effects of serine-to-alanine, or threonine-to-alanine, mutations on TFEB subcellular localization. FLAG immunostaining (red) of HeLa cells that express TFEB-3xFLAG carrying different serine-to-alanine mutations. Nuclei were stained with dapi (blue). Scale bars represent 10 $\mu$ m.

#### **Figure S5**

Torin 1 treatment induces lysosomal clustering of TFEB-GFP. HeLa cells that stably express TFEB-GFP were treated with vehicle (top) or Torin 1 (bottom), imaged by the OPERA system (Perkin Elmer). Yellow arrows indicate lysosomal clusters of TFEB-GFP in vehicle-treated cells. Scale bars represent 10 $\mu$ m.

#### **Figure S6**

Torin 1 causes nuclear and lysosomal accumulation of TFEB in Rag<sup>CA</sup>-expressing HEK-293T cells. Cells were co-transfected with TFEB-GFP and either Rap2A or Rag<sup>CA</sup>, and either left untreated or treated with Torin 1 for 1h.

#### **Figure S7**

Quantitative polymerase chain reaction (qPCR) of TFEB target genes in primary hepatocytes from control (flox/flox) and Tcfef<sup>-/-</sup> (flox/flox; alb-Cre) mice. The level of target genes in Tcfef<sup>-/-</sup> samples is expressed as fold change over control samples. Values represent means $\pm$ SD of three independent hepatocyte preparations (3 mice/genotype). Student t test (two tailed) \* = P value  $\leq$  0.05.

### **Figure S8**

Nuclear translocation of TFEB-GFP in TSC<sup>+/+</sup> and TSC2<sup>-/-</sup> MEFs induced by either amino acid starvation, chloroquine or Torin 1.  $2 \times 10^6$  TSC2<sup>+/+</sup> and TSC2<sup>-/-</sup> MEFs were transfected with 1  $\mu$ g of a TFEB-GFP plasmid by nucleofection, and plated at a density of 300,000 cells/dish in 35mm, glass-bottom Mattek dishes. The next day, MEFs were either switched to fresh culture media, or to fresh media containing Torin 1 or Chloroquine, or transferred to RPMI without amino acids supplemented with 10% dialyzed FBS. After 1h, MEFs were fixed in 4% PFA, stained with DAPI and imaged by spinning disk confocal.

Scale bars represent 10  $\mu$ m.

### **Figure S9**

Nuclear translocation of endogenous TFEB in TSC2<sup>+/+</sup> and TSC2<sup>-/-</sup> MEFs induced by either amino acid starvation, chloroquine or Torin 1. MEFs were plated at a density of 300,000 cells in 35mm dishes containing 2 glass coverslips each. The next day, MEFs were either switched to fresh culture media, or to fresh media containing Torin 1 or Chloroquine, or transferred to RPMI without amino acids supplemented with 10% dialyzed FBS. After 1h, coverslips were fixed in 4% PFA, stained with antibodies against endogenous TFEB and RagC and with DAPI, and imaged by spinning disk confocal.

Scale bars represent 10  $\mu$ m.

## **SUPPLEMENTARY MOVIE LEGENDS**

### **Movie S1**

Spinning disk confocal movie of a MEF co-transfected with TFEB-GFP (green) and mRFP-Rab7 (red), showing TFEB localization to Rab7-positive lysosomes. Playback speed = 64x.

### **Movie S2**

Spinning disk confocal movie of a MEF co-transfected with TFEB-GFP (green) and mRFP-Rab7 (red) and treated with Torin 1 at the start of the imaging period. The movie shows how the progressive appearance of TFEB-GFP signal on several lysosomes parallels its massive accumulation in the nucleus. Playback speed = 900x.

### **Movie S3**

Spinning disk confocal movie of a TFEB-GFP expressing HeLa cell treated with Torin 1 at the start of the imaging period. The movie shows how the progressive appearance of TFEB-GFP signal on several lysosomes parallels its massive accumulation in the nucleus. Playback speed = 600x.

### **Movie S4**

FRAP experiment on TFEB-GFP positive lysosomes from a control MEF (*left*) and a MEF treated with Torin 1 (*right*). Photobleaching was achieved with

high power 488nm laser light. The movie shows the differences in the speed and amount of fluorescence recovery between the two conditions. Playback speed = 96x.

Figure S1

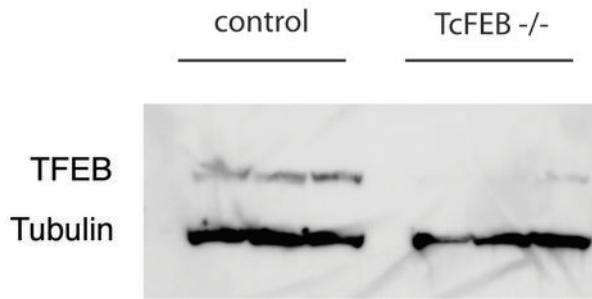

Figure S2

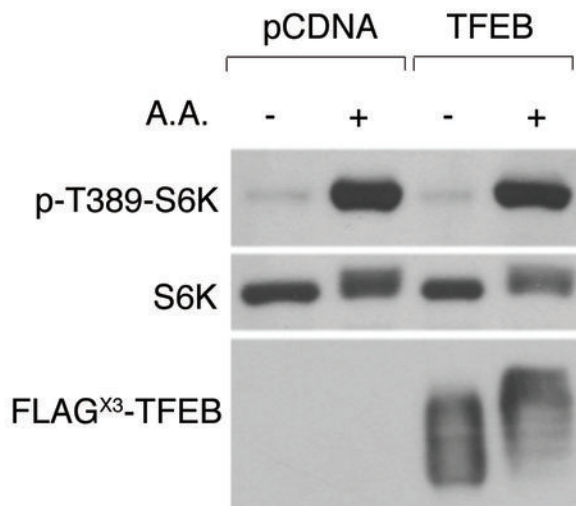

Figure S3

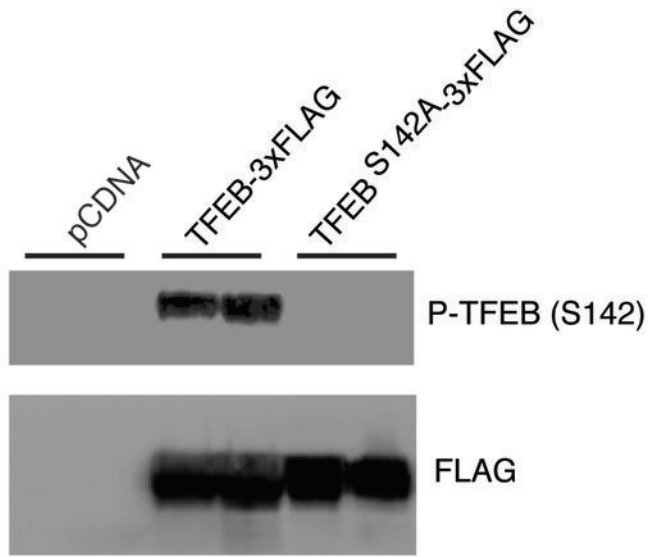



Figure S4

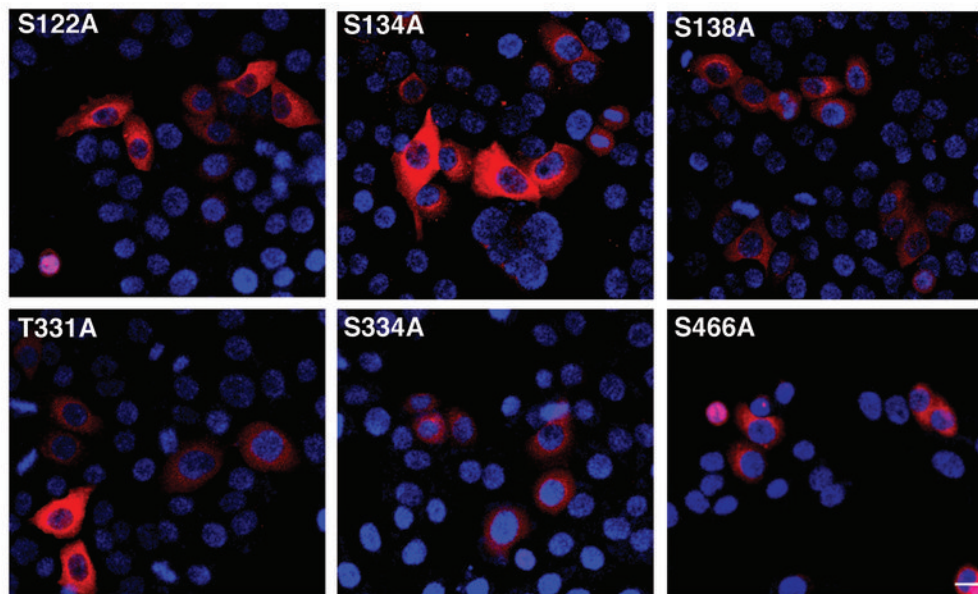

Figure S5

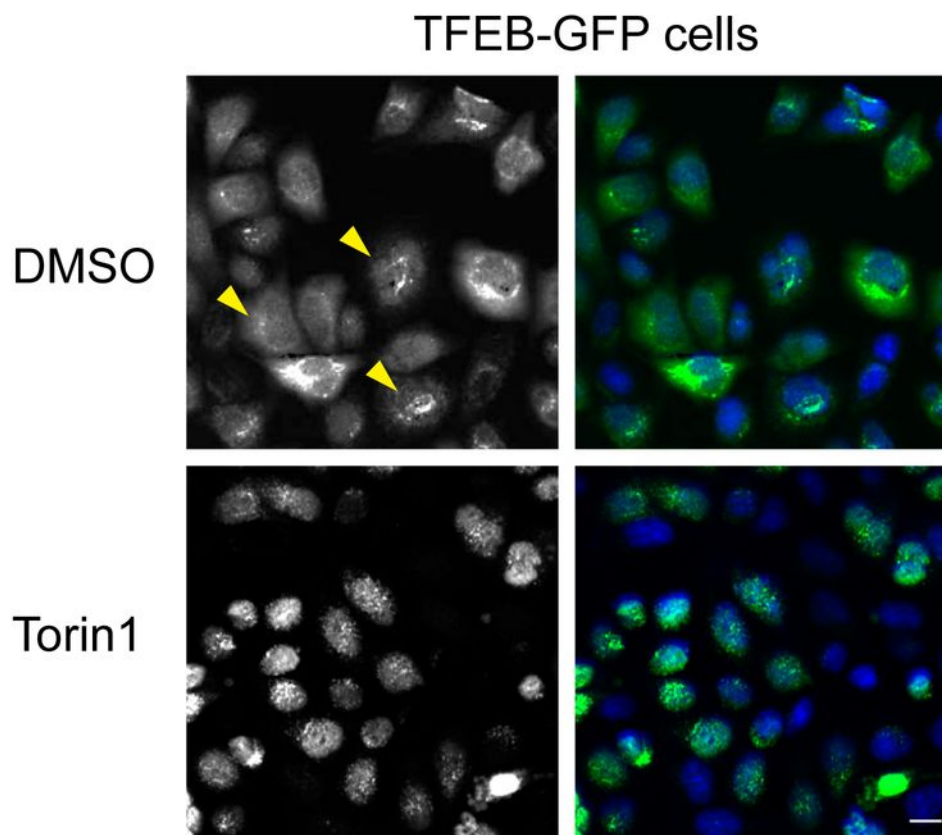

Figure S6

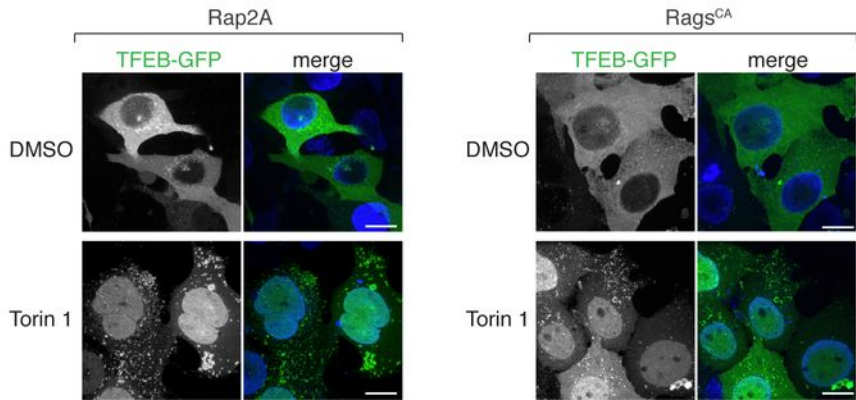

Figure S7

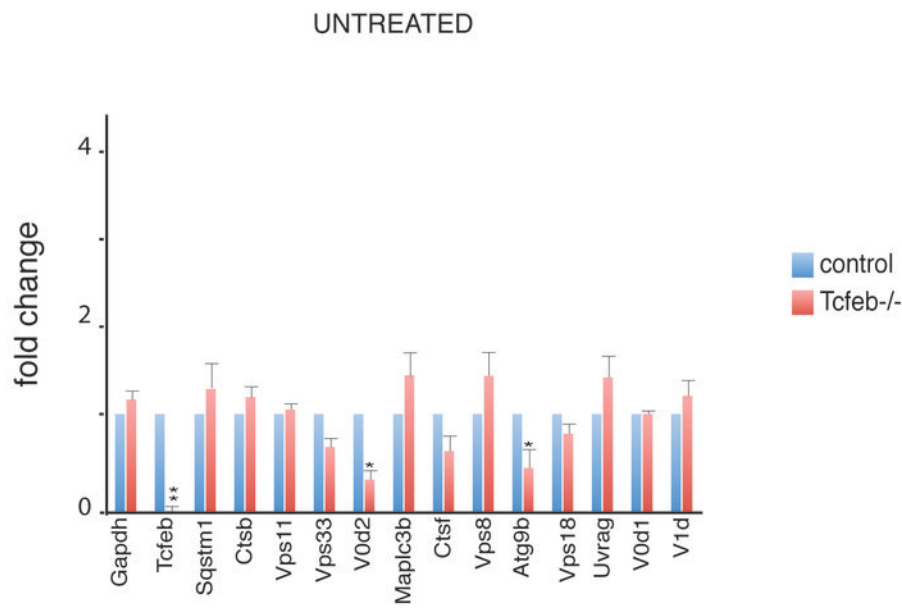

Figure S8

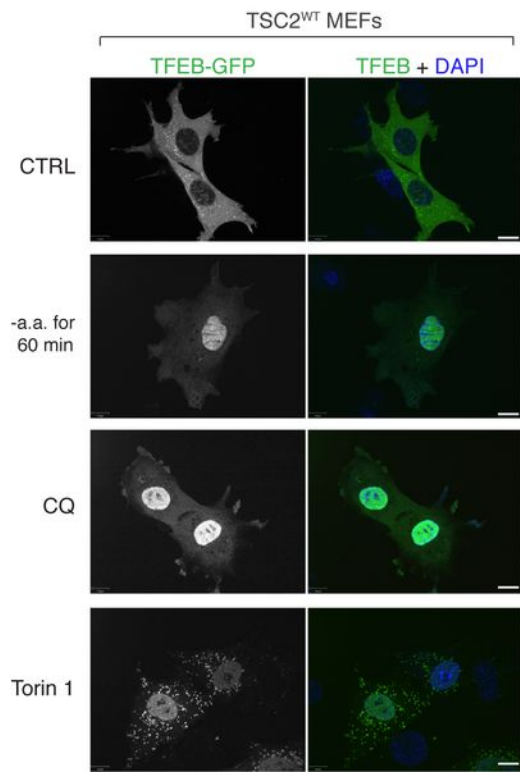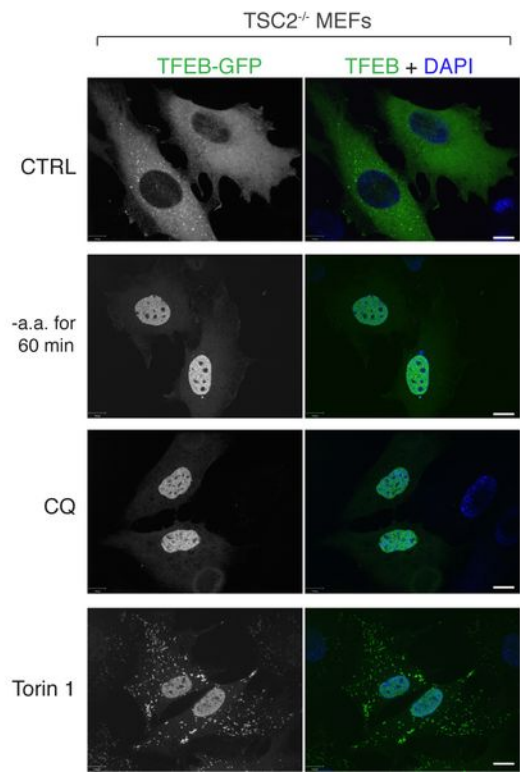

Figure S9

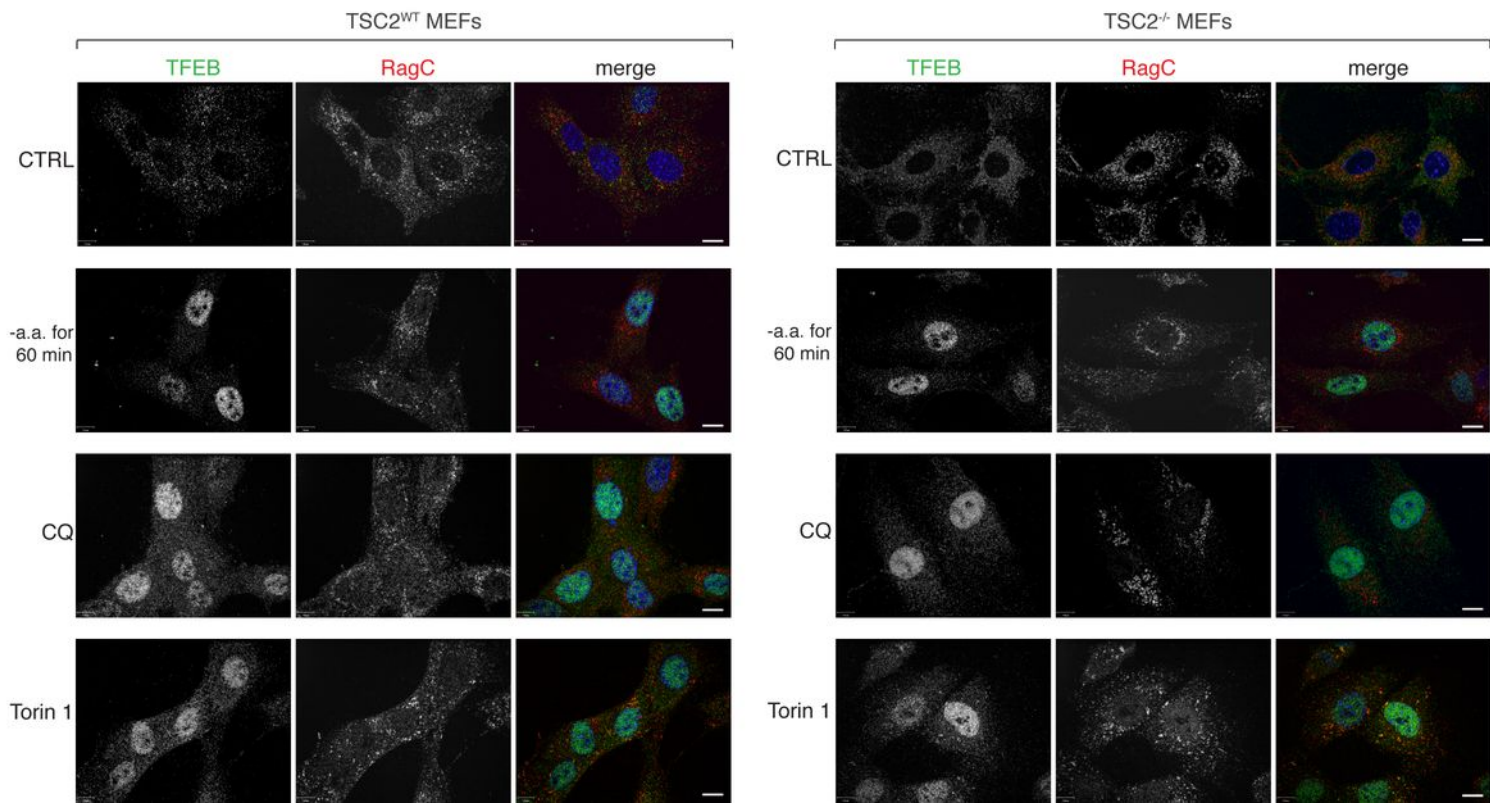

Supplement: emboj201232s5.pdf [file emboj201232s5.pdf]
